# Supplementary material
Source: Springer Nature journal article supplement (https://www.springermedizin.de/resource/supplementary/12865_2013_546_MOESM4_ESM.pdf/9428182)

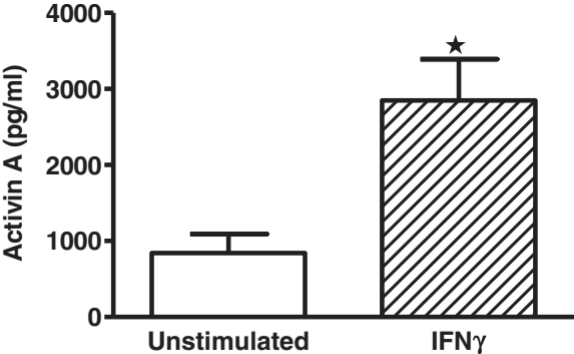

★  $p < 0.05$ ,  $n = 3$

Supplement: MOESM4 [file 9428182]
